# Supplementary material
Source: PubMed Central journal article supplement (PMC3852615)

## Supplemental Figure 1

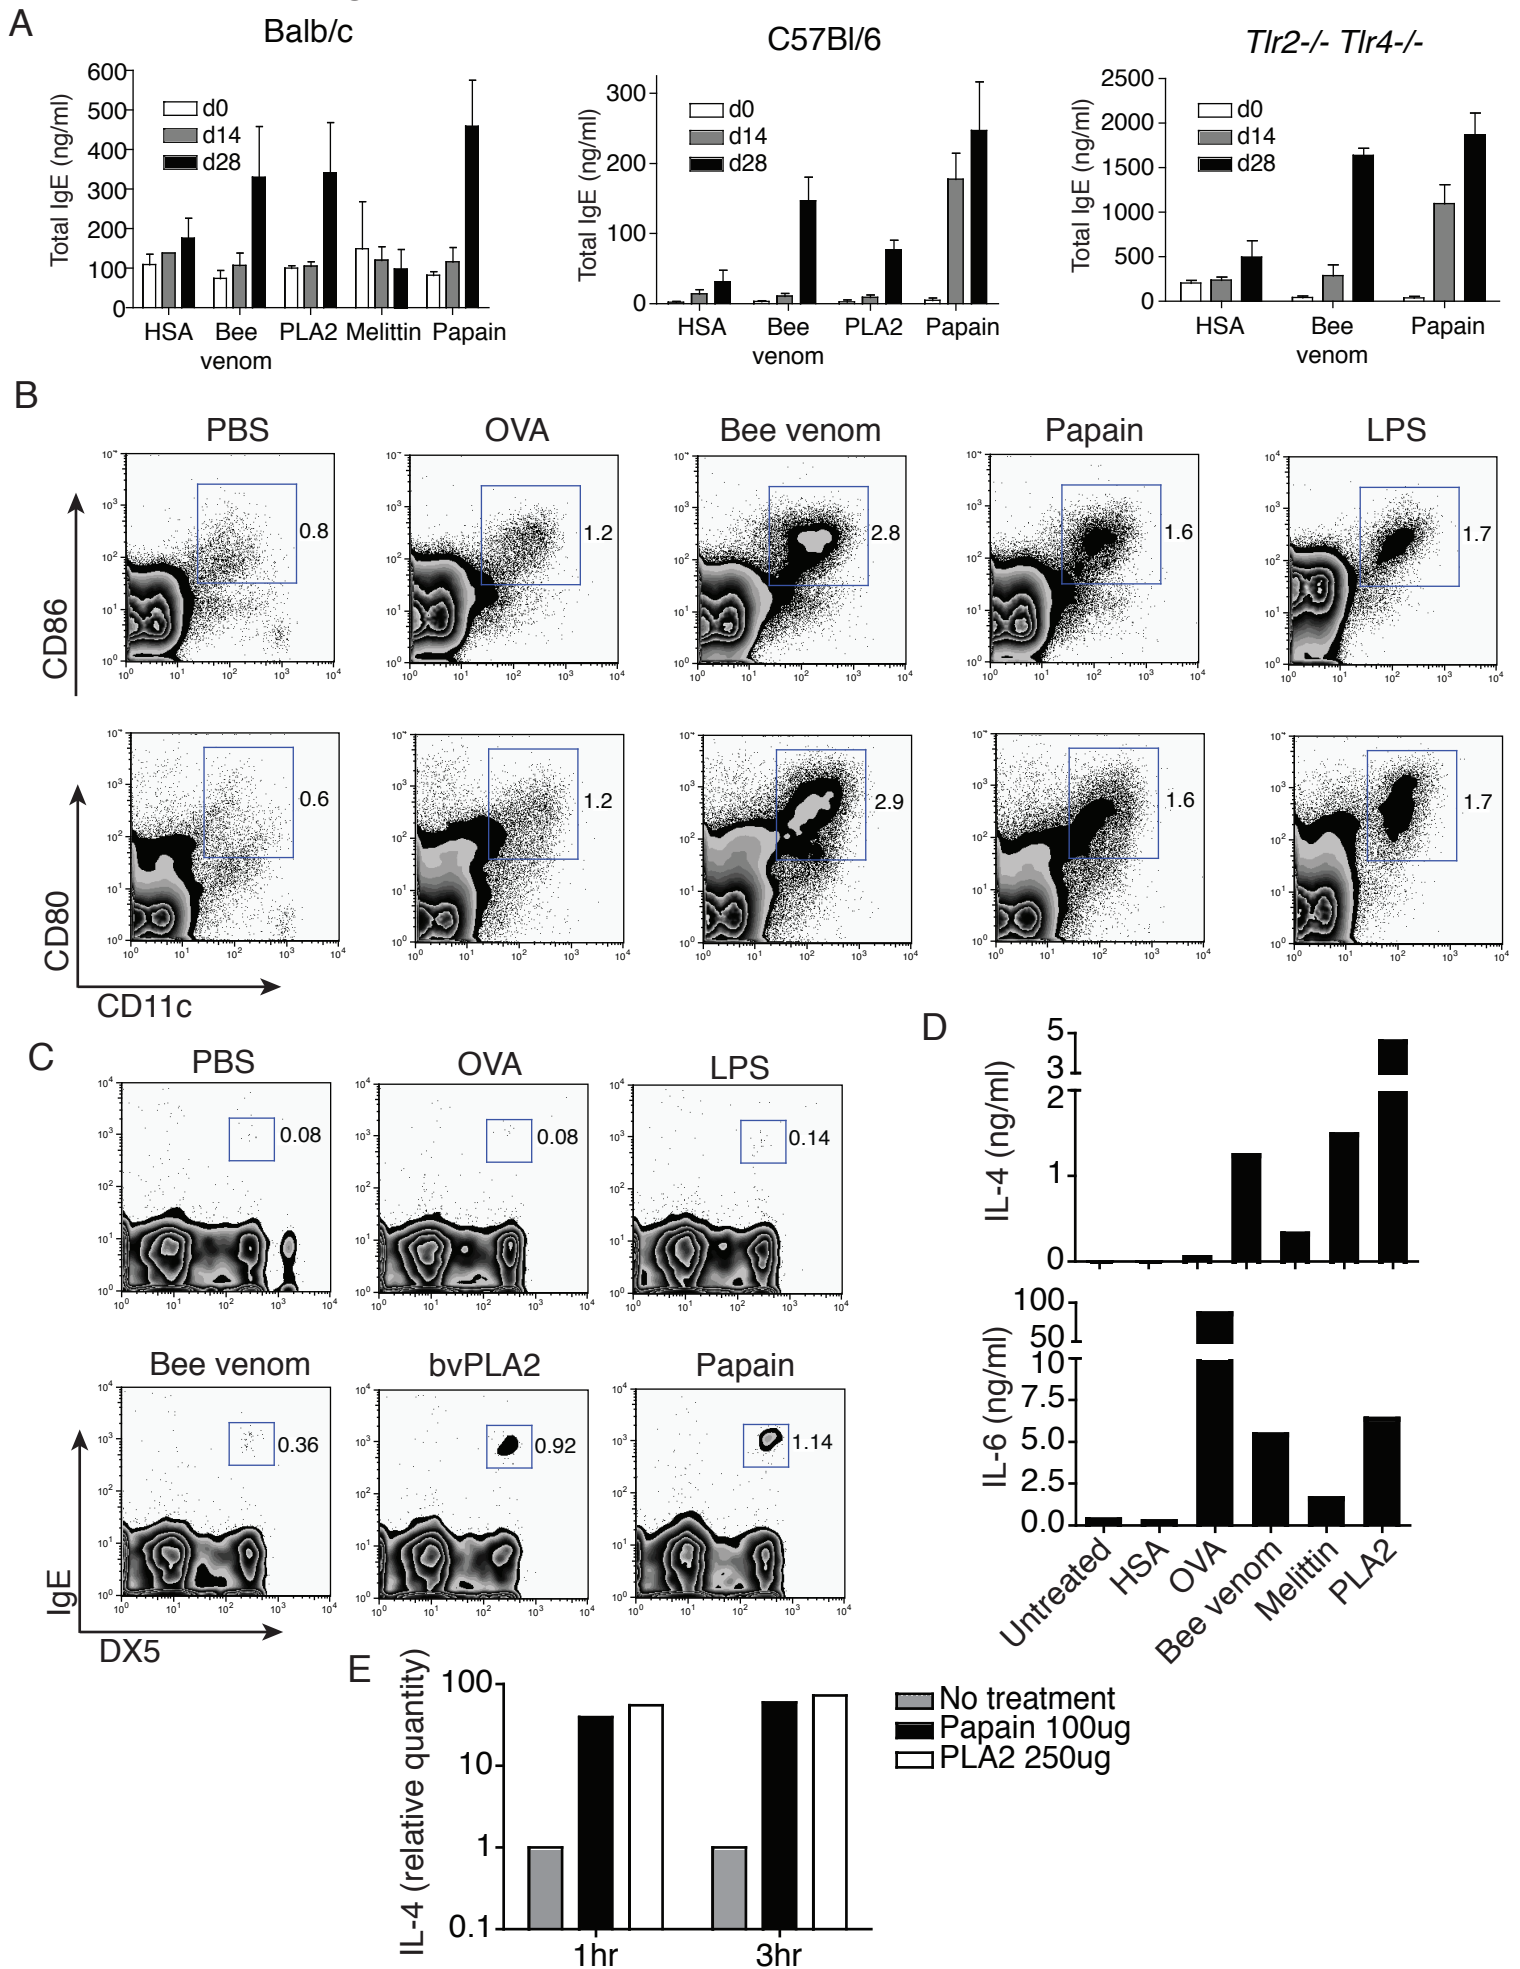

## Supplemental Figure 2

A

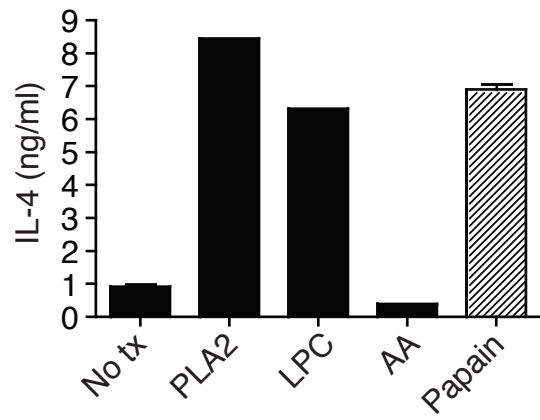

B

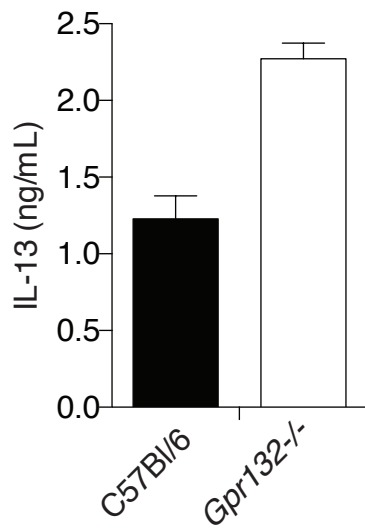

C

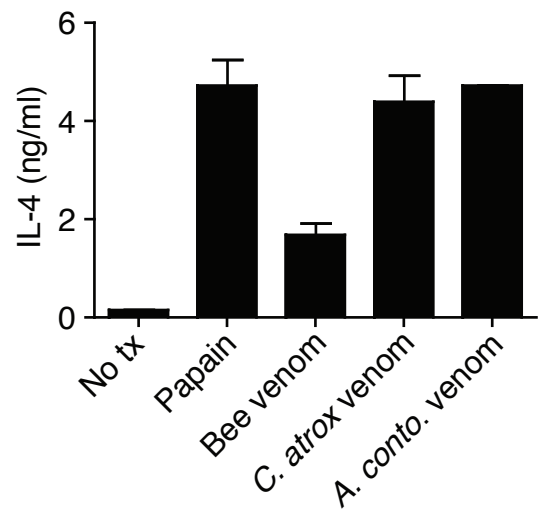

# Supplemental Figure 3

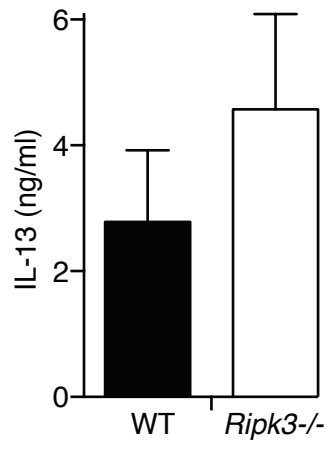

## Supplemental Figure 4

A

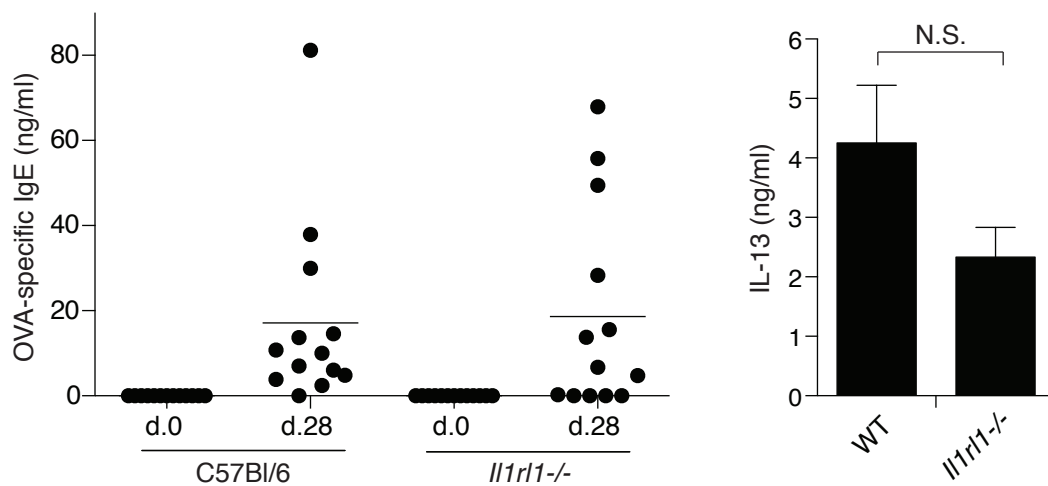

B

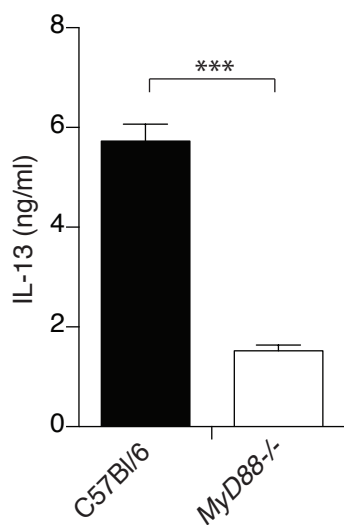

C

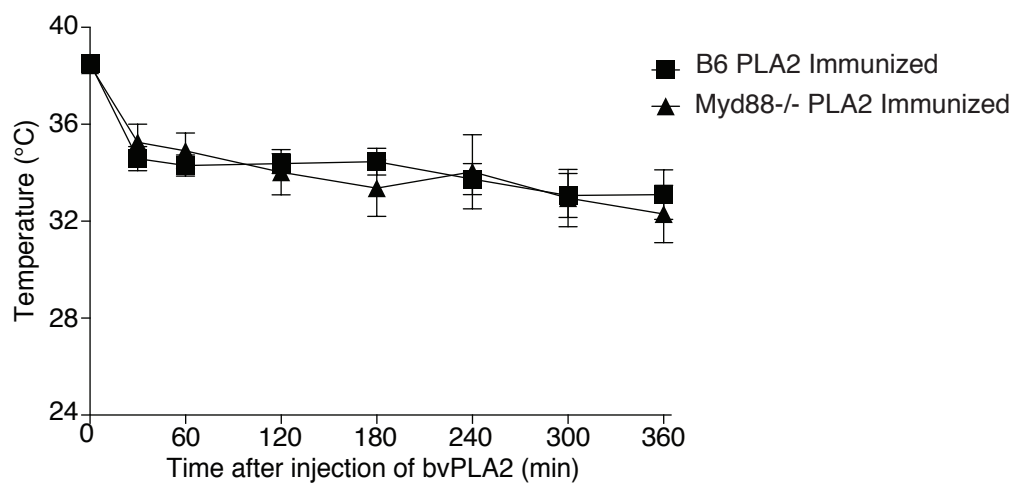

D

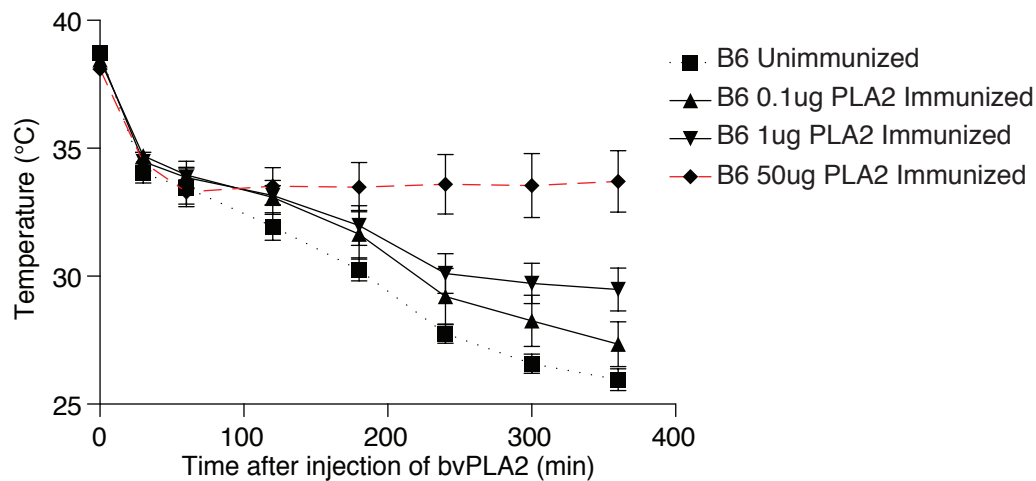

Supplement: NIHMS532244-supplement-01.pdf [file NIHMS532244-supplement-01.pdf]
